1 **PREPRINT – NOT PEER REVIEWED**

2

3 **ORIGINAL RESEARCH**

4

5 **Age-related differences in performance and fatigability during an isometric quadriceps intermittent**

6 **fatigue test**

7

8 Giorgio Varesco<sup>1</sup>, Eric Luneau<sup>1</sup>, Léonard Féasson<sup>1,2</sup>, Thomas Lapole<sup>1</sup> & Vianney Rozand<sup>1</sup>

9

10 <sup>1</sup>Université de Lyon, UJM-Saint-Etienne, Laboratoire Interuniversitaire de Biologie de la Motricité, EA

11 7424, F-42023, Saint-Etienne, France. <sup>2</sup>Unité de Myologie, Service de Physiologie Clinique et de l'Exercice,

12 Centre Référent Maladies Neuromusculaires Euro-NmD, CHU de Saint-Etienne, France.

13

14

15 **Abstract (250 words)**

16 The aim of the present study was to investigate age-related differences in fatigability induced by an isometric  
17 quadriceps intermittent fatiguing test in young (<35 years old), old (>60 years old) and very old (>80 years  
18 old) men and women. Maximal force loss, contractile function and voluntary activation of the knee extensors  
19 were evaluated throughout an isometric fatiguing test using femoral nerve magnetic stimulations. Older  
20 adults performed more contractions (index of relative performance) than young ( $P = 0.046$ ) and very old  
21 adults ( $P = 0.007$ ), without differences between young and very old adults. Total work (absolute  
22 performance) was greater for young and old adults compared to very old adults ( $P < 0.001$ ), without  
23 differences between young and old adults. At exhaustion, force loss was greater for young ( $-28 \pm 9\%$ )  
24 compared to old adults ( $-19 \pm 8\%$ ), but not very old adults ( $-23 \pm 8\%$ ). The response to femoral nerve  
25 stimulation decreased similarly at exhaustion for the three age groups, indicating similar alteration in  
26 contractile function with age. No impairment in voluntary activation was observed. Impairments in  
27 neuromuscular parameters were similar for men and women. This study showed that older adults were less  
28 fatigable than young adults during an isometric intermittent fatiguing task of the knee extensors. This greater  
29 fatigue resistance was not maintained in very old adults independent of sex. Fatigability at exhaustion was  
30 likely due to impairments in contractile function for the three age groups.

31

## 32 **Introduction**

33 Healthy ageing is usually accompanied by impairments in neuromuscular function and fatigability, leading to  
34 increased risk of autonomy loss and incidence of frailty [1]. These impairments are not linear with age. For  
35 example, the decline of maximal isometric force accelerates in very old adults (i.e. >80 years) compared to  
36 old adults (i.e. >60 years) [2,3], with greater impairments in women compared to men [4,5]. In a recent meta-  
37 analysis, Krüger et al. [6] reported an overall lower performance fatigability (exercise-induced maximal  
38 force loss) in older compared to young adults after isometric fatiguing tasks. However, these results are  
39 equivocal, with some studies reporting a large effect size (Hedges's  $g > 2$ ) and others reporting no age-related  
40 difference or greater fatigability in older adults [6]. Importantly, studies investigating performance  
41 fatigability after isometric tasks in very old adults are limited. Allman and Rice [7] compared performance  
42 fatigability after an intermittent isometric fatiguing task of the elbow flexors between young and very old  
43 adults, and reported similar values between the two age groups. However, the absence of a group of older  
44 adults did not allow the rate of decline in neuromuscular function between old and very old adults to be  
45 determined. Justice et al. [8] showed that time to exhaustion during an isometric sustained fatiguing task of  
46 the ankle dorsiflexors was longer for older adults (65-75 yr) compared to young adults (<35 yr), with similar  
47 performance between young and very old adults (75-90 yr). However, performance fatigability was not  
48 investigated in this study, nor the mechanisms explaining these age-related differences, *i.e.* above (voluntary  
49 activation) or below (contractile function) the neuromuscular junction.

50 In old adults, impairments in voluntary activation following single-limb exercises seem to be similar  
51 compared to young adults [6]. Conversely, impairments in contractile function with fatigue show  
52 inconsistent results, with similar or lower alterations in old compared to young adults after isometric  
53 fatiguing tasks [6]. Again, evidence for alterations in voluntary activation and contractile function in very old  
54 adults are scarce. Sundberg et al. [9] observed greater impairments in contractile function but not voluntary  
55 activation compared to young and old adults. Because variability increases with advancing age, standardized  
56 and validated testing procedures as well as assessments of physical activity levels are needed when  
57 comparing groups of different ages [10].

58 Thus, the present study aimed to investigate performance fatigability of the knee extensor (KE) muscles  
59 induced by the isometric quadriceps intermittent fatiguing (QIF) test in young, old and very old men and  
60 women. We expected similar performance fatigability in young and very old adults after the isometric  
61 intermittent fatiguing test, while older adults would show a lower performance fatigability. We further  
62 hypothesized lower impairments in contractile function in old adults than very old and young adults, without  
63 age-related differences in voluntary activation impairments.

## 64 **Methods**

### 65 *Participants*

66 Thirty young adults [15 men (YM); 15 women (YW)], 19 old adults [10 men (OM); 9 women (OW)] and 30  
67 very old adults [15 men (VOM); 15 women (VOW)] participated in the study and were clearly informed on  
68 the experimental procedures prior giving their written consent. Participants were free from psychological,  
69 musculoskeletal and neurological disorders or disability, and were asked to avoid exercise and alcohol  
70 consumption for 24 h before each visit. All the procedures were approved by the Comité de Protection des  
71 Personnes and were performed in accordance with the declaration of Helsinki (2013; ClinicalTrials.gov  
72 identifier: NCT02675192). The University Hospital of Saint-Etienne (France) was the sponsor of this study.

### 73 *Experimental protocol*

74 Participants visited the laboratory on two separate occasions. During the first visit, all participants were  
75 familiarized with the neuromuscular testing procedures, and an accelerometer (wGT3X-BT; ActiGraph,  
76 Pensacola, USA) was given to wear for 7 consecutive days to objectively assess physical activity [11]. The  
77 old and very old adults also performed a 6-minutes-walk-test (6MWT), which consisted in covering the  
78 longest distance possible in 6 minutes in a corridor of 30 meters [12]. One week later during the second visit,  
79 KE function was evaluated using the isometric QIF test [13].

### 80 *Experimental setup*

81 Participants were seated upright on a custom-build chair with the hip angle set at 120° (180°= full extension)  
82 to facilitate coil placement over the femoral triangle (see below). Knee angle was fixed at 90°. The right leg  
83 was systematically evaluated other than for specific reasons (i.e. operated knee, unilateral pain). In these

84 instances, the left leg was tested (1 OW, 2 VOM, 1 VOW). Extraneous movements of the upper body were  
85 minimized using belts across the waist and the thorax. Force of the KE was assessed using a force transducer  
86 (Omega Engineering Inc., Stamford, CT, USA) firmly attached over the malleoli, and digitized at a sampling  
87 rate of 2 kHz by PowerLab System (16/30-ML880/P, AD Instruments, Bella Vista, Australia).

#### 88 *Femoral nerve magnetic stimulation*

89 Femoral nerve magnetic stimulation (FNMS) was performed with a 45-mm figure-of-eight coil powered by  
90 two linked Magstim 200 stimulators (peak magnetic field: 2.5 T, stimulation duration: 0.1 ms; Magstim,  
91 Whitland, UK). The coil was positioned above the femoral triangle to recruit the femoral nerve and all  
92 stimuli were given at 100% of the maximum stimulator output. Optimal stimulation site evoking the highest  
93 twitch force amplitude was determined with minor adjustments and marked on the skin. FNMS  
94 supramaximality was checked with decreasing stimulator power output (100%, 95%, and 90%). Because  
95 FNMS effectiveness in deliver supramaximal stimuli is altered when fat thickness under the coil increases  
96 [14], clear plateaus in maximal twitch amplitude were not observed for all participants. Thus, only valid  
97 responses to FNMS were retained for analysis (YM: 15; OM: 8; VOM: 10; YW: 15; OW: 9; VOW: 8).

#### 98 *Isometric QIF test*

99 The session started with a warm-up consisting of three ~3-s contractions at 30%, 50% and 70% of the  
100 perceived maximal force. Successively, two 5-s maximal voluntary isometric contractions (MVICs) were  
101 performed, separated by 1-min of rest. A third MVIC was performed if the difference between the peak force  
102 values was >5%. Participants were instructed to push “as hard as possible” and strong verbal encouragement  
103 was provided. Visual feedback of the force signal was displayed on a screen positioned in front of the  
104 participants. Then, a neuromuscular evaluation (NME) was performed. NME consisted of a 5-s MVIC during  
105 which a 100-Hz doublet ( $Db_{100,s}$ ) was superimposed through FNMS, and a resting potentiated 100-Hz  
106 doublet ( $Db_{100}$ ) delivered ~2 s after relaxation. Once the baseline measures were performed, the QIF test  
107 started after at least 1 min of recovery.

108 The QIF test consisted of incremental sets of 10 intermittent (5-s on / 5-s off) isometric contractions, starting  
109 at 10% MVIC for the first set, with increments of 10% MVIC per set until exhaustion [13]. Visual feedback  
110 of the target force level was provided, and participants followed a soundtrack with the contraction-relaxation

111 rhythm. A line of 4-N thickness indicated the target force (2 N below and 2 N above). Exhaustion was  
112 defined as two consecutive contractions where force decreased below the target force level for 2.5 s. NME  
113 was performed immediately (~2 s) at the end of each set and at task failure. The duration between the end of  
114 a set and the beginning of the following one was standardized at 25 s.

#### 115 *Data analysis*

116 Physical activity data were analyzed using ActiLife software (v6.13.4, ActiGraph, Pensacola, USA) and  
117 quantified as steps·day<sup>-1</sup>. All the remaining data were analyzed using Labchart software (v8,  
118 ADInstruments). MVIC was calculated as the average of the highest 0.5-s window of the contraction.  
119 Performance fatigability was defined as the percentage of MVIC loss from baseline. Total work was  
120 calculated as the sum of the force–time integral of each contraction and indicated absolute performance at  
121 the QIF test. Total number of contractions performed indicated relative performance. Voluntary activation  
122 (VA) was calculated from the formula:  $VA\% = Db_{100,s}/Db_{100} \times 100$ . Impairments in contractile function were  
123 quantified as the change in  $Db_{100}$  from baseline.

#### 124 *Statistical Analysis*

125 All variables are reported as mean  $\pm$  SD in the text, tables and figures. Generalized Linear Models were used  
126 to analyze the age- and sex-related differences in anthropometric (age, weight, height) and neuromuscular  
127 characteristics at baseline (absolute and normalized MVIC,  $Db_{100}$ , VA), and performance (total work,  
128 number of contractions). Generalized Estimating Equations analyses using an autoregressive (AR-1)  
129 structure were performed on data expressed relative to baseline to investigate the effects of age and sex  
130 across the QIF test on MVIC,  $Db_{100}$  and VA [stage (stages 1, 2, 3, 4 and exhaustion)  $\times$  age (young: YA vs.  
131 OA vs. VOA)  $\times$  sex (men, women)]. Because participants performed different numbers of stages, data were  
132 compared until the last stage performed by all participants (i.e. 4<sup>th</sup> stage). For all analyses, when significant  
133 effects were observed, Bonferroni correction was applied to post-hoc analyses. Significance was set at  $P \leq$   
134 0.05. Statistical analysis was conducted using SPSS software (Version 23.0, IBM, Chicago, IL).

135

## 136 **Results**

### 137 *Baseline measurements*

138 Table 1 summarizes the participants' characteristics. Young and old adults walked significantly more  
139 steps·day<sup>-1</sup> than very old adults (age effect,  $P < 0.001$ ), with women being more active than men (sex effect,  
140  $P = 0.013$ ). Very old adults performed shorter distance at the 6MWT than old adults (age effect,  $P < 0.001$ )  
141 with women performing shorter distance than men (sex effect,  $P < 0.001$ ).

142 \*\*\* *Table 1 around here*\*\*\*

143 Men were stronger than women for all age groups. MVIC decreased with age (sex × age interaction:  $P <$   
144  $0.001$ ; Table 2). When normalized to body weight, MVIC showed no sex × age interaction ( $P = 0.545$ ), but  
145 decreased with age (age effect,  $P < 0.001$ ), being greater in men than women (sex effect,  $P = 0.006$ ; Table 2).  
146 Absolute  $Db_{100}$  values at baseline showed significant sex × age interaction ( $P = 0.001$ ). For men,  $Db_{100}$   
147 significantly decreased with age (all  $P < 0.001$ ; Table 2). For women, significant differences were found  
148 between YW and VOW, and between OW and VOW (all  $P < 0.001$ ). No difference was observed between  
149 YW and OW ( $P = 0.407$ ; Table 2).  $Db_{100}$  was different between sexes only in the young group ( $P < 0.001$ ;  
150 Table 2). VA did not show main effects of age or sex ( $P = 0.278$  and  $P = 0.098$ , respectively), nor age × sex  
151 interaction ( $P = 0.567$ ; Table 2).

152 \*\*\**Table 2 around here*\*\*\*

### 153 *Performance fatigability*

154 Among all the participants, 2 VOM and 4 VOW did not perform the QIF test due to knee pain. Thus,  
155 performance data were analyzed for 13 VOM and 11 VOW. Number of contractions was similar across sexes  
156 ( $P = 0.733$ ) but differed with age ( $P = 0.008$ ). Post-hoc analysis indicated that older adults performed more  
157 contractions than young ( $P = 0.046$ ) and very old adults ( $P = 0.007$ ), without differences between young and  
158 very old adults ( $P = 1.000$ , Figure 1A). No significant age × sex interaction was found for number of  
159 contractions ( $P = 0.218$ ). Total work showed significant main effects of age ( $P < 0.001$ ) and sex ( $P < 0.001$ ),  
160 but no age × sex interaction ( $P = 0.949$ ). Post-hoc analyses showed greater total work for young and old  
161 adults compared to very old adults, without differences between young and old adults, and greater total work  
162 for men compared to women (Figure 1B).

163

164 \*\*\**Figure 1 around here*\*\*\*

165

166 No main effect of sex nor sex  $\times$  stage, sex  $\times$  age or sex  $\times$  stage  $\times$  age interactions were found for the changes  
167 in MVIC, Db<sub>100</sub> and VA during and after the QIF test (all  $P > 0.05$ ). Thus, performance fatigability data for  
168 men and women were pooled together.

169 A significant stage  $\times$  age interaction was observed for the decrease in MVIC relative to baseline ( $P < 0.001$ ;  
170 Figure 2A). The decrease in MVIC was greater for very old adults than young adults at stages 1, 2 and 3. At  
171 exhaustion, MVIC loss was greater for young ( $-28 \pm 9\%$ ) compared to old adults ( $-19 \pm 8\%$ ), but not very old  
172 adults ( $-23 \pm 8\%$ ; Figure 2A). Db<sub>100</sub> showed a significant effect of stage ( $P < 0.001$ ; Figure 2B), indicating  
173 that the response to FNMS decreased throughout the test without age-related differences. Significant age  $\times$   
174 stage interaction was found for VA ( $P = 0.027$ ; Figure 2C), with a lower voluntary activation at stage 1 for  
175 very old adults compared to baseline and young adults.

176

177 \*\*\**Figure 2 around here*\*\*\*

178

## 179 **Discussion**

180 The present study investigated the age-related differences in performance and performance fatigability using  
181 a standardized isometric fatiguing test in men and women. Greater relative performance (number of  
182 contractions) was observed for old adults compared to young and very old adults, independent of sex.  
183 Similar total work was observed for young and old adults, with very old adults showing the lowest total work  
184 values. After the QIF test, force loss was greater for young compared to old adults without differences with  
185 very old adults, independent of sex. Impairments in contractile function were similar across ages, with no  
186 changes in voluntary activation.

187

### 188 *Neuromuscular characteristics at baseline*

189 Maximal force production capacity (absolute and relative to body weight) decreased with age for both sexes.  
190 This could be explained by a greater fat mass accumulation with advancing age, lowering the force-body  
191 weight ratio, or by a decrease in muscle quality (strength per unit of muscle volume). Other than age, a  
192 decreased muscle quality could be induced by the lower physical activity of very old adults compared to the



193 other age groups. Indeed, physical activity has a positive effect on the maintenance of muscle quality with  
194 ageing [15], and appears particularly important in maintaining muscle function and autonomy in very old  
195 adults [5]. Furthermore, the force evoked at rest by FNMS decreased with age, in agreement with previous  
196 studies evaluating the KE muscles [16,17,18,19], evidencing a loss of muscle contractile tissue with age. VA  
197 at baseline was similar between age groups. With age, a moderate alteration in VA was previously observed,  
198 but results are heterogeneous between studies [20]. The absence of age-related differences in VA in the  
199 present study might be due to the relatively high physical activity level of the participants [21], which has  
200 been shown to preserve the capacity to activate the working muscles [11,20]. It is possible, however, that the  
201 effectiveness of FNMS was limited by the fat thickness of older and very old adults [14], limiting the  
202 interpretation of those results despite our precautions.

203

#### 204 *Performance and performance fatigability*

205 Old adults performed more contractions compared to the other two groups. However, because young adults  
206 were stronger than old adults, total work performed (absolute performance) was similar between those two  
207 groups. MVIC loss at exhaustion was greater for young than for old adults, but not very old adults. These  
208 results indicate greater fatigue resistance for the old adults (similar absolute performance with reduced force  
209 loss), but not very old adults (similar force loss, but lower absolute performance) compared to young adults.  
210 In older adults, the preferential loss in fast-twitch motor units is associated with an increase in slow-twitch  
211 motor units proportion and size with age, resulting in a relatively higher reliance on the oxidative metabolism  
212 [6,22,23,24]. This would lead to a greater fatigue resistance for old than young adults during isometric tasks  
213 at relative workloads [6,19,22]. Similar results were previously found on middle-age adults compared to  
214 young adults using a similar QIF test [25].

215 A novel finding of the present study is the loss of greater fatigue resistance in very old adults compared to  
216 young adults during isometric tasks of the KE. This agrees with previous evidences on the elbow flexors  
217 during an isometric intermittent time to exhaustion task at 60% MVIC [7]. These authors did not observed  
218 any differences in time to exhaustion or performance fatigability etiology between young and very old  
219 adults, despite the greater absolute workload in young adults [7]. In very old adults, muscle atrophy and loss  
220 of both slow- and fast-twitch motor units would decrease neuromuscular function compared to old adults

221 [1,26]. We reported greater force loss at low workloads (*i.e.* 10%, 20% and 30% of MVIC) for very old  
222 compared to young adults. At exhaustion, MVIC percentage loss of very old adults was between that of  
223 young and old adults, without significant difference from the latter two groups, as already reported for  
224 concentric tasks [9].

225 No sex-related differences in performance fatigability were observed for the three age groups. Similar results  
226 were reported during intermittent isometric task of the plantar dorsiflexors [27] and concentric task of the KE  
227 [9]. Conversely, women showed lower performance fatigability compared to men after a sustained 120-s KE  
228 MVIC independent of age [19], probably because they performed lower total work [19,28]. Taken together  
229 with the literature, the present results indicate that sex-related differences in performance fatigability are  
230 task-specific in young and older adults.

231 The significant drop in  $Db_{100}$  for the three age groups indicated impairments in contractile function  
232 throughout the QIF test, without age- or sex-related differences. Different results have been observed in  
233 studies comparing young adults with old [6] and very old [7,9] adults, probably because of the different  
234 fatiguing protocols adopted [29]. In isometric mode, blood flow occlusion induced by sustained contractions  
235 impedes oxygenated blood to reach the capillaries [30]. This facilitates impairments in contractile function  
236 [31], attributed to an alteration in excitation-contraction coupling linked with high ATP turnover, free  
237 phosphate and  $H^+$  accumulation [32]. Metabolites accumulation in the working fibers and the recruitment of  
238 fast-twitch motor units, composed by type II fibers (less oxygen dependent [30]), could impair performance  
239 particularly in very old adults [33]. Regarding central impairments, high levels of physical activity of our  
240 participants might prevented an observable alteration in VA, as previously reported comparing trained and  
241 untrained individuals [25]. Nevertheless, differences in fatigability in absence of impairments in VA have  
242 already been observed in studies investigating sex- [34] and age-related differences [9].

243

#### 244 *Conclusions*

245 The present study showed that the greater fatigue resistance of old adults during an isometric intermittent  
246 fatiguing task of the KE was not maintained at very old age compared to young adults. Performance  
247 fatigability at exhaustion was likely due to impairments in contractile function for the three age groups.  
248 Finally, performance fatigability and its etiology were similar between men and women independent of age.

249

250 *References*

- 251 **1.** Hunter SK. Performance fatigability: Mechanisms and task specificity. *Cold Spring Harb Perspect*  
252 *Med* 2018; 8: 1–22.
- 253 **2.** Mitchell WK, Williams J, Atherton P, Larvin M, Lund J, Narici M. Sarcopenia, dynapenia, and the  
254 impact of advancing age on human skeletal muscle size and strength; a quantitative review. *Front*  
255 *Physiol* 2012; 3 JUL: 1–18.
- 256 **3.** Venturelli M, Reggiani C, Richardson RS, Schena F. Skeletal Muscle Function in the Oldest-Old:  
257 The Role of Intrinsic and Extrinsic Factors. *Exerc Sport Sci Rev* 2018; 46: 188–194.
- 258 **4.** Haynes EMK, Neubauer NA, Cornett KMD, O'Connor BP, Jones GR, Jakobi JM. Age and sex-  
259 related decline of muscle strength across the adult lifespan: a scoping review of aggregated data. *Appl*  
260 *Physiol Nutr Metab* 2020; 1–12.
- 261 **5.** Varesco G, Coudy-Gandilhon C, Lapole T *et al.* Association Between Physical Activity, Quadriceps  
262 Muscle Performance, and Biological Characteristics of Very Old Men and Women. *Journals Gerontol*  
263 *Ser A* 2021; in press.
- 264 **6.** Krüger R, Aboodarda S, Samozino P, Rice C, Millet G. Isometric versus Dynamic Measurements of  
265 Fatigue: Does Age Matter? A Meta-analysis. *Med Sci Sport Exerc* 2018; 50: 2132–2144.
- 266 **7.** Allman BL, Rice CL. Incomplete recovery of voluntary isometric force after fatigue is not affected by  
267 old age. *Muscle and Nerve* 2001; 24: 1156–1167.
- 268 **8.** Justice JN, Mani D, Pierpoint LA, Enoka RM. Fatigability of the dorsiflexors and associations among  
269 multiple domains of motor function in young and old adults. *Exp Gerontol* 2014; 55: 92–101.
- 270 **9.** Sundberg CW, Kuplic A, Hassanlouei H, Hunter SK. Mechanisms for the age-related increase in  
271 fatigability of the knee extensors in old and very old adults. *J Appl Physiol* 2018; 125: 146–158.
- 272 **10.** Varesco G, Hunter SK, Rozand V. Physical activity and aging research: opportunities abound. *Appl*  
273 *Physiol Nutr Metab* 2021; 3: 1–3.
- 274 **11.** Varesco G, Hunter SK, Rozand V. Physical activity and aging research: opportunities abound. *Appl*  
275 *Physiol Nutr Metab* 2021; In press.
- 276 **12.** Crapo RO, Casaburi R, Coates AL *et al.* ATS Statement. *Am J Respir Crit Care Med* 2002; 166: 111–

- 277 117.
- 278 **13.** Bachasson D, Millet GY, Decorte N, Wuyam B, Levy P, Verges S. Quadriceps function assessment  
279 using an incremental test and magnetic neurostimulation: A reliability study. *J Electromyogr Kinesiol*  
280 2013; 23: 649–658.
- 281 **14.** Tomazin K, Verges S, Decorte N, Oulerich A, Maffiuletti NA, Millet GY. Fat tissue alters quadriceps  
282 response to femoral nerve magnetic stimulation. *Clin Neurophysiol* 2011; 122: 842–847.
- 283 **15.** Barbat-Artigas S, Dupontgand S, Pion CH, Feiter-Murphy Y, Auertbin-Leheudre M. Identifying  
284 recreational physical activities associated with muscle quality in men and women aged 50 years and  
285 over. *J Cachexia Sarcopenia Muscle* 2014; 5: 221–228.
- 286 **16.** Dalton BH, Power GA, Paturel JR, Rice CL. Older men are more fatigable than young when matched  
287 for maximal power and knee extension angular velocity is unconstrained. *Age (Omaha)* 2015; 37: 1–  
288 16.
- 289 **17.** Mcphee JS, Maden-Wilkinson TM, Narici M V., Jones DA, Degens H. Knee extensor fatigue  
290 resistance of young and older men and women performing sustained and brief intermittent isometric  
291 contractions. *Muscle and Nerve* 2014; 50: 393–400.
- 292 **18.** Senefeld J, Yoon T, Bement MH, Hunter SK. Fatigue and recovery from dynamic contractions in  
293 men and women differ for arm and leg muscles. *Muscle Nerve* 2013; 48: 436–439.
- 294 **19.** Solianik R, Kreivėnaitė L, Streckis V, Mickevičienė D, Skurvydas A. Effects of age and sex on  
295 fatigability and recovery from a sustained maximal isometric voluntary contraction. *J Electromyogr*  
296 *Kinesiol* 2017; 32: 61–69.
- 297 **20.** Rozand V, Sundberg CW, Hunter SK, Smith AE. Age-related Deficits in Voluntary Activation: A  
298 Systematic Review and Meta-analysis. *Med Sci Sports Exerc* 2020; 52: 549–560.
- 299 **21.** Tudor-locke CE, Craig CL, Brown WJ *et al.* How Many Steps / day are Enough □? For Older Adults  
300 and Special Population. *Int J Behav Nutr Phys Act* 2011 2011; 1–17.
- 301 **22.** Hunter SK, Critchlow A, Enoka RM. Muscle endurance is greater for old men compared with  
302 strength-matched young men. *J Appl Physiol* 2005; 99: 890–897.
- 303 **23.** McNeil CJ, Rice CL. Neuromuscular adaptations to healthy aging. *Appl Physiol Nutr Metab* 2018;  
304 43: 1158–1165.

- 305 **24.** Lanza IR, Befroy DE, Kent-Braun JA. Age-related changes in ATP-producing pathways in human  
306 skeletal muscle in vivo. *J Appl Physiol* 2005; 99: 1736–1744.
- 307 **25.** Bachasson D, Decorte N, Wuyam B, Millet GY, Verges S. Original Research: Central and peripheral  
308 quadriceps fatigue in young and middle-aged untrained and endurance-trained men: A comparative  
309 study. *Exp Biol Med* 2016; 241: 1844–1852.
- 310 **26.** Purves-Smith FM, Sgarioto N, Hepple RT. Fiber typing in aging muscle. *Exerc Sport Sci Rev* 2014;  
311 42: 45–52.
- 312 **27.** Kent-Braun JA, Ng A V., Doyle JW, Towse TF. Human skeletal muscle responses vary with age and  
313 gender during fatigue due to incremental isometric exercise. *J Appl Physiol* 2002; 93: 1813–1823.
- 314 **28.** Hureau TJ, Hucteau E, Massamba A, Mallard J, Ducrocq GP. Identifying sex differences in  
315 neuromuscular fatigue: the challenge of normalizing exercise intensity and interpreting the results  
316 between populations. *J Physiol* 2021; 599: 2801–2802.
- 317 **29.** Thomas K, Goodall S, Howatson G. Performance Fatigability Is Not Regulated to A Peripheral  
318 Critical Threshold. *Exerc Sport Sci Rev* 2018; 46: 240–246.
- 319 **30.** Moritani T, Sherman WM, Shibata M, Matsumoto T, Shinohara M. Oxygen availability and motor  
320 unit activity in humans. *Eur J Appl Physiol Occup Physiol* 1992; 64: 552–556.
- 321 **31.** Copithorne DB, Rice CL. Neuromuscular function and blood flow occlusion with dynamic arm flexor  
322 contractions. *Med Sci Sports Exerc* 2020; 52: 205–213.
- 323 **32.** Sundberg CW, Fitts RH. ScienceDirect Bioenergetic basis of skeletal muscle fatigue. *Curr Opin*  
324 *Psychol* 2019; 10: 118–127.
- 325 **33.** Sundberg CW, Prost RW, Fitts RH, Hunter SK. Bioenergetic basis for the increased fatigability with  
326 ageing. *J Physiol* 2019; 0: 1–15.
- 327 **34.** Hunter SK, Butler JE, Todd G, Gandevia SC, Taylor JL. Supraspinal fatigue does not explain the sex  
328 difference in muscle fatigue of maximal contractions. *J Appl Physiol* 2006; 101: 1036–1044.

329

330

331 **Figure captions**

332 *Figure 1. Total number of contractions (panel A) and total work performed at the quadriceps intermittent*  
333 *fatigue test (panel B) for young, old and very old men and women. Total work was greater for men than*  
334 *women in all age groups (all  $P < 0.05$ ). Squared parentheses indicate significant main effect of age. YM:*  
335 *young men; YW: young women; OM: old men; OW: old women; VOM: very old men; VOW: very old*  
336 *women. \*\*\*= significantly different from the young group ( $P < 0.001$ ). \$\$\$= significantly different from the*  
337 *old group ( $P < 0.001$ ).*

338

339 *Figure 2. Maximal isometric force (MVIC, Panel A), doublet amplitude ( $Db_{100}$ , Panel B) and voluntary*  
340 *activation (VA, Panel C) during the QIF test for young, old and very old adults. Because no effect of sex was*  
341 *observed, men and women were pooled together. Squared parenthesis in panel B indicates significant effect*  
342 *of stage. \*= significantly different from pre ( $P < 0.05$ ). # = significantly different from young adults ( $P <$*   
343 *0.05).*

344

345 **Figures**

346 *Figure 1.*

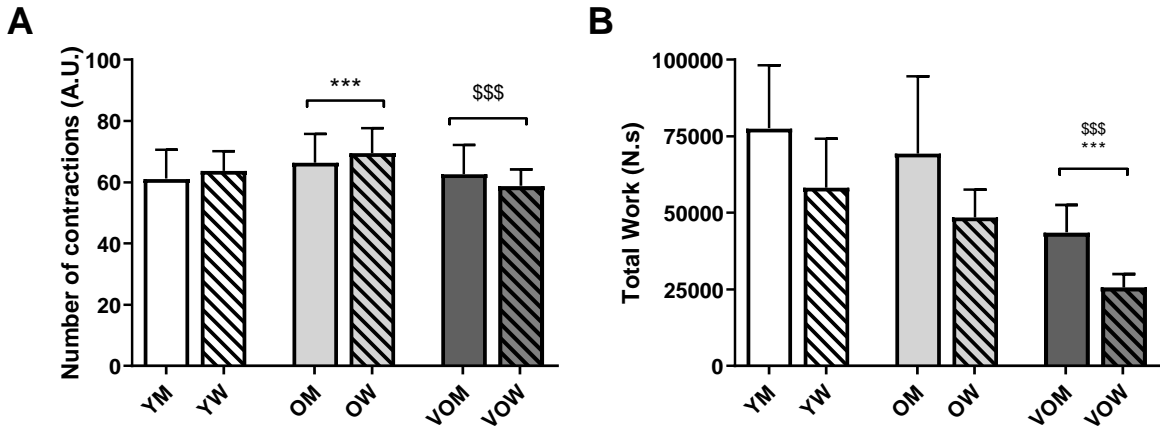

347

348 *Figure 2.*

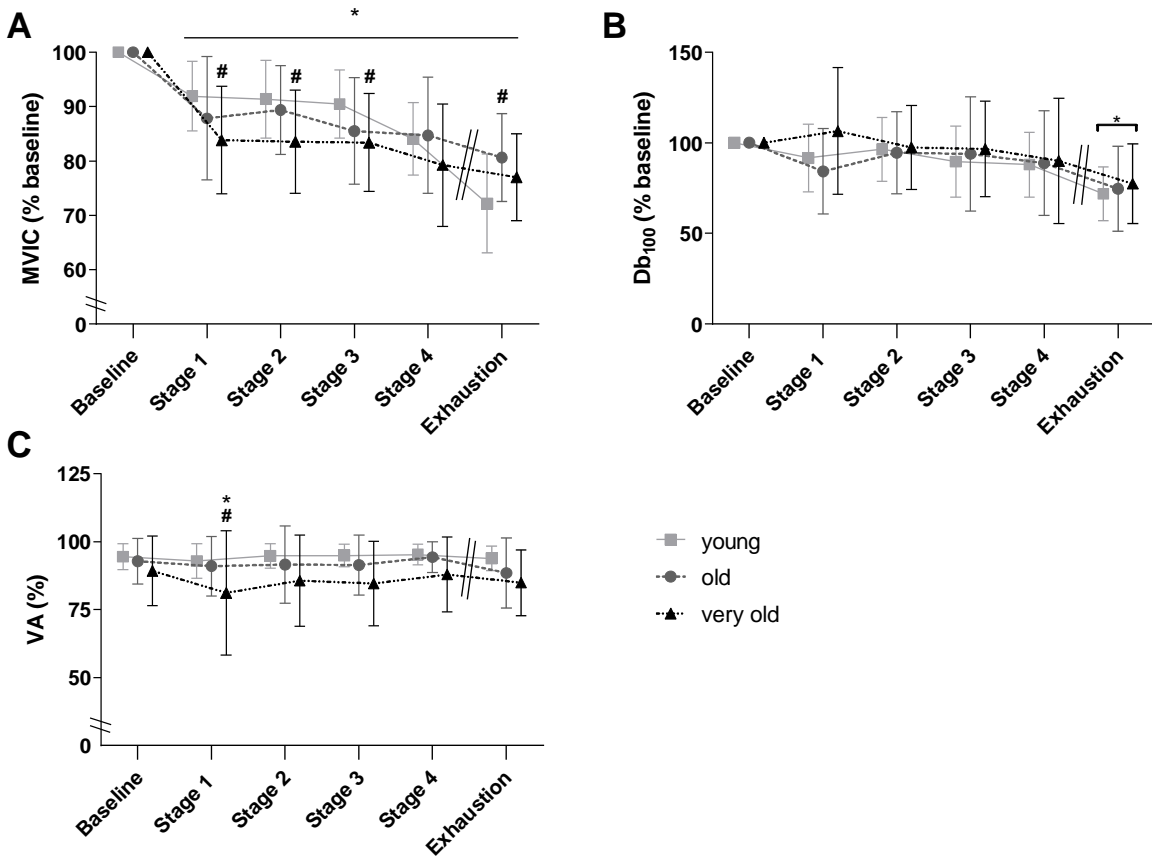

349

350

351 **Tables**

352 *Table 1. Characteristics of the participants*

|                         | YM           | YW           | OM           | OW            | VOM               | VOW                  |
|-------------------------|--------------|--------------|--------------|---------------|-------------------|----------------------|
| Age (years)             | 24±3         | 23±3         | 68±4***      | 67±5***       | 82±1***,\$\$\$    | 82±1***,\$\$\$       |
| Weight (kg)             | 76.7±12.2    | 58.5±10.0### | 79.5±10.5    | 52.4±3.7###   | 72.6±7.5          | 64.5±8.1###,\$\$     |
| Height (cm)             | 179.7±6.7    | 163.6±6.1### | 176.9±5.7    | 161.9±4.9###  | 168.6±5.4***,\$\$ | 160.8±6.5##          |
| Steps.day <sup>-1</sup> | 11,245±2,364 | 12,083±2,750 | 11,890±4,746 | 15,458±2,851  | 8,957±2,168       | 9,687±2,120          |
| 6MWT (m)                |              |              | 683.4±59.6   | 600.6±68.7### | 430.7±52.3\$\$\$  | 389.7±57.1###,\$\$\$ |

353

354 *YM: young men; YW: young women; OM: old men; OW: old women; VOM: very old men; VOW: very old*

355 *women; 6MWT: 6-minutes Walk Test. # = significantly different from men of the same age group. ## = P<0.01;*

356 *### = P<0.001. \* = significantly different from the young group of the same sex. \*\*\* = P<0.001. \$ =*

357 *significantly different from the old group of the same sex. \$\$ = P<0.01; \$\$\$ = P<0.001.*

358

359 *Table 2. Neuromuscular characteristics of participants at baseline.*

|                               | YM      | YW        | OM         | OW           | VOM              | VOW             |
|-------------------------------|---------|-----------|------------|--------------|------------------|-----------------|
| MVIC (N)                      | 690±94  | 468±91### | 532±141*** | 343±43###,** | 356±79***,\$\$\$ | 246±40##,***,\$ |
| MVIC/BW (N.kg <sup>-1</sup> ) | 9.1±1.2 | 8.1±1.5   | 6.9±2.2    | 6.6±0.9      | 5.0±1.2          | 3.9±0.6         |
| Db <sub>100</sub> (N)         | 233±45  | 168±42### | 146±93***  | 140±25       | 43±25***,\$\$\$  | 39±45***,\$\$\$ |
| VA (%)                        | 93±6    | 96±3      | 90±11      | 95±5         | 90±15            | 89±10           |

360 *YM: young men; YW: young women; OM: old men; OW: old women; VOM: very old men; VOW: very old*

361 *women; MVIC: maximal voluntary isometric contraction force; BW: body weight; Db<sub>100</sub>: amplitude of the*

362 *doublet evoked at rest. VA: voluntary activation. # = significantly different from men of the same age group.*

363 *## = P<0.01; ### = P<0.001. \* = significantly different from the young group of the same sex. \*\* = P<0.01;*

364 *\*\*\* = P<0.001. \$ = significantly different from the old group of the same sex. \$ = P<0.05; \$\$\$ = P<0.001.*

365
